# Supplementary material
Source: publisher figshare collection journal article supplement (https://acs.figshare.com/ndownloader/files/10290873)
Supplement: Supplementary file 1 [file 10290873]

## Supporting Information

### **Exploit Carbon Materials to Accelerate Initiation and Enhance Process Stability of CO Anaerobic Open-Culture Fermentation**

*Fan Lü,<sup>a,b,c</sup> Ke-jian Guo,<sup>a,b,c</sup> Hao-wen Duan,<sup>a,b,c</sup> Li-ming Shao,<sup>b,c,d</sup> Pin-jing He,<sup>\*,a,b,c,d</sup>*

<sup>a</sup> State Key Laboratory of Pollution Control and Resource Reuse, Tongji University,  
Shanghai 200092, China

<sup>b</sup> Shanghai Institute of Pollution Control and Ecological Security, Shanghai 200092,  
China

<sup>c</sup> Institute of Waste Treatment and Reclamation, Tongji University, Shanghai 200092,  
China

<sup>d</sup> Centre for the Technology Research and Training on Household Waste in Small  
Towns & Rural Area, Ministry of Housing Urban-Rural Development, Shanghai  
200092, China

\* Corresponding to: [solidwaste@tongji.edu.cn](mailto:solidwaste@tongji.edu.cn)

This Supporting Information consists of twelve pages, three figures, and one table.

## **List of Texts, Figure and Table Captions**

**Texts S1** Experiment description. 1) Basic nutrient solution per liter; 2) The methods for detecting gas components, VFAs and alcohols; 3) The experiment to evaluate CO-liquid mass transfer efficiency.

**Texts S2** Principal component analysis.

**Figure S1** Changes in pH in four stages.

**Figure S2** Taxonomic classification of the microbial communities in phyla level.

**Figure S3** Concentrations of dissolved CO in water with existence of Effect of five different carbon materials.

**Figure S4** Principal component analysis. (a) total microbiomes, (b) bacteria, (c) archaea.

**Table S1** Parameters related to microbial community diversity.

**Text S1. Experiment description.****1) Basic nutrient solution per liter**

The basic nutrient solution per liter was composed of: 0.1 g of magnesium chloride ( $\text{MgCl}_2 \cdot 6\text{H}_2\text{O}$ ), 0.075 g calcium chloride ( $\text{CaCl}_2 \cdot 2\text{H}_2\text{O}$ ), 0.02 g ferrous chloride ( $\text{FeCl}_2 \cdot 4\text{H}_2\text{O}$ ), 0.53 g ammonium chloride ( $\text{NH}_4\text{Cl}$ ), 0.1 g sodium sulfide ( $\text{Na}_2\text{S} \cdot 9\text{H}_2\text{O}$ ), 2.77 g dipotassium phosphate ( $\text{K}_2\text{HPO}_4$ ), 2.8 g monopotassium phosphate ( $\text{KH}_2\text{PO}_4$ ), 0.1 g yeast extract, 5 mL trace element solution, and 2 mL vitamin solution. The compositions of the trace element and the vitamin solution are described in Lin et al.[1].

**2) The methods for detecting gas components, VFAs and alcohols**

Gas components ( $\text{H}_2$ ,  $\text{CH}_4$ ,  $\text{CO}$ ,  $\text{CO}_2$ ,  $\text{O}_2$ ,  $\text{N}_2$ ) were measured using a Gas Chromatography (Trace 1300, Thermo Fisher Scientific, USA) equipped with a Thermal Conductivity Detector and a  $5 \text{ m} \times 2.1 \text{ mm}$  Carboxen-1000 column with argon as the carrier gas. The column temperature was held at  $60^\circ\text{C}$  for 7 min and increased to  $225^\circ\text{C}$  at a rate of  $60^\circ\text{C}$  per min. The concentration of volatile fatty acids (VFAs, including formate, acetate, propionate, n-butyrate, iso-butyrate, n-valerate, and iso-valerate) was measured by a high-performance liquid chromatography (LC-20AD, Shimadzu, Kyoto, Japan) with a COD-10AVP conductivity detector and a Shim-pack SPR-H analytical column. To measure alcohols (including methanol, ethanol, propanol, iso-butanol, and butanol), a gas chromatography (Focus GC, Thermo Scientific Co., Waltham, MA, USA) equipped with a Flame Ionization Detector and a  $30 \text{ m} \times 0.53 \text{ mm}$  HP-FFAP fused silica capillary column was used. The column operating temperature was held at  $40^\circ\text{C}$  for 2.5 min, then increased by

12 °C/min to 100 °C and then held for 2 min.

### **3) The experiment to evaluate CO-liquid mass transfer efficiency**

Six additional bottles were prepared in the same manner as described for the above reactors to determine the enhancement of carbon materials on CO-liquid mass transfer efficiency. Five grams of the five different carbon materials were added to the bottles separately. In order to rule out the effects of microbial utilization on CO dissolution, the six bottles without inoculum were purged with nitrogen to create an oxygen-free environment. Gas circulation was run for 6 hours which is equivalent to the ventilation cycle time. The amount of CO dissolved in the liquid was calculated by subtracting the vapor-phase gas concentration measured over the course of the experiment from the initial concentration of the gas in the experimental apparatus. At this point, it can be determined whether or not the addition of the carbon material can increase the amount of dissolved CO relative to the blank group.

#### **Text S2 Principal component analysis.**

Quadrant distribution and distribution distance can be used to assess similarities, if samples are in the same quadrant and the distribution distance of them is closer, they can be considered similar in nature. Therefore, microbiomes from different fractions at different  $p_{CO}$  are clustered into three groups according to the quadrant distribution and distribution distance in Figure S4. 1) The samples from the solid fractions, relating to higher abundance of *Methanosaeta*; 2) The samples from the liquid fractions in stage II or stage III ( $p_{CO} = 0.21$  or  $0.41$  atm), relating to

WCHB1-69, Rhodocyclaceae, and Hydrogenophilaceae; 3) The samples from the liquid fractions in the final stage when  $p_{CO}$  was 0.69 atm, relating to Synergistaceae.

# Reference:

[1] Lin Y, Lü F, Shao L, He P. Influence of bicarbonate buffer on the methanogenetic pathway during thermophilic anaerobic digestion. *Bioresource Technology*. 2013;137:245-53.

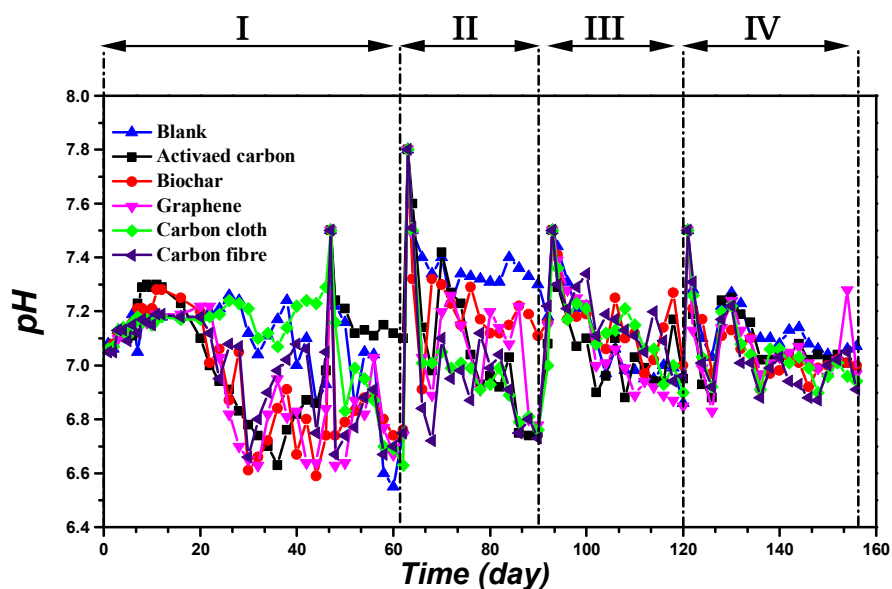

**Figure S1** Changes in pH in four stages. According to the  $p_{CO}$ , the experiment was divided into four stages: I (0–62 d), II (63–92 d), III (93–120 d), and IV (121–156 d), corresponding to an initial  $p_{CO}$  of 0.07 atm, 0.21 atm, 0.41 atm and 0.69 atm, respectively.

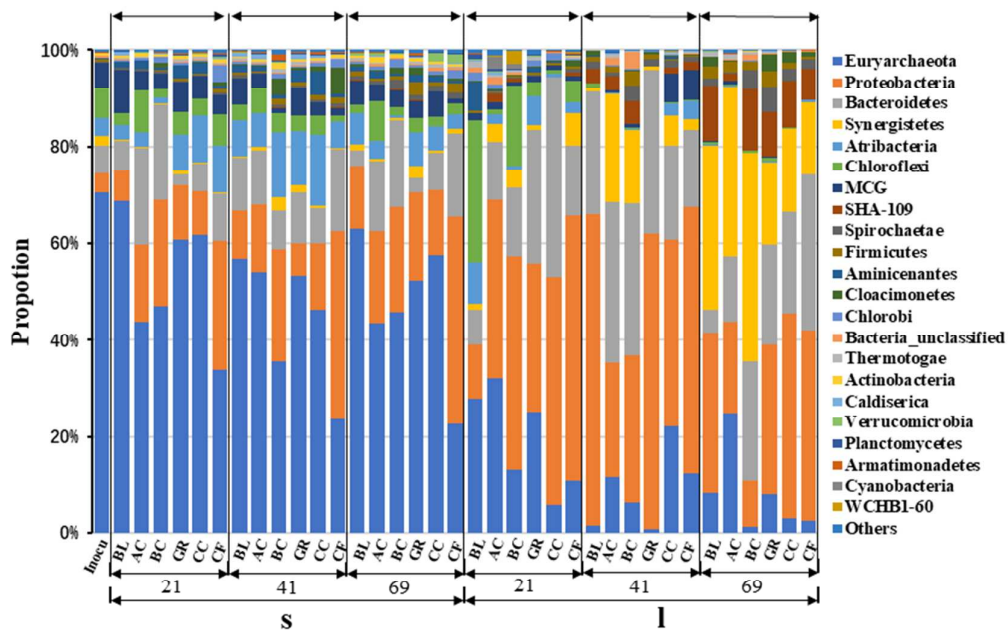

**Figure S2** Taxonomic classification of the microbial communities in phyla level. “s” and “l”: the fractions of sediment and liquid; “21” (0.21 atm p<sub>CO</sub>), “41” (0.41 atm p<sub>CO</sub>) and “69” (0.69 atm p<sub>CO</sub>): different stages with p<sub>CO</sub>; “BL”: blank without additives, “AC”: addition with carbon material activated carbon, “BC”: biochar, “GR”: graphene, “CC”: carbon cloth, “CF”: carbon fibre; “Inocu”: the inoculum.

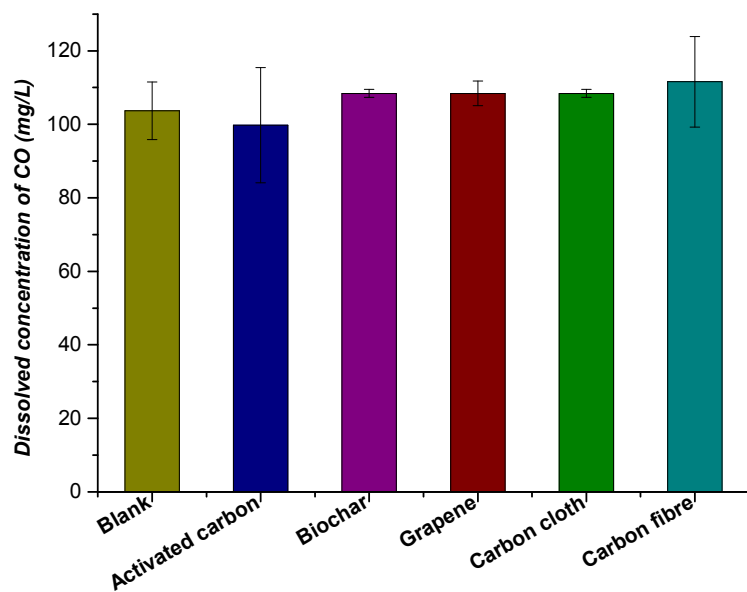

**Figure S3** Concentrations of dissolved CO in water with existence of five different carbon materials.

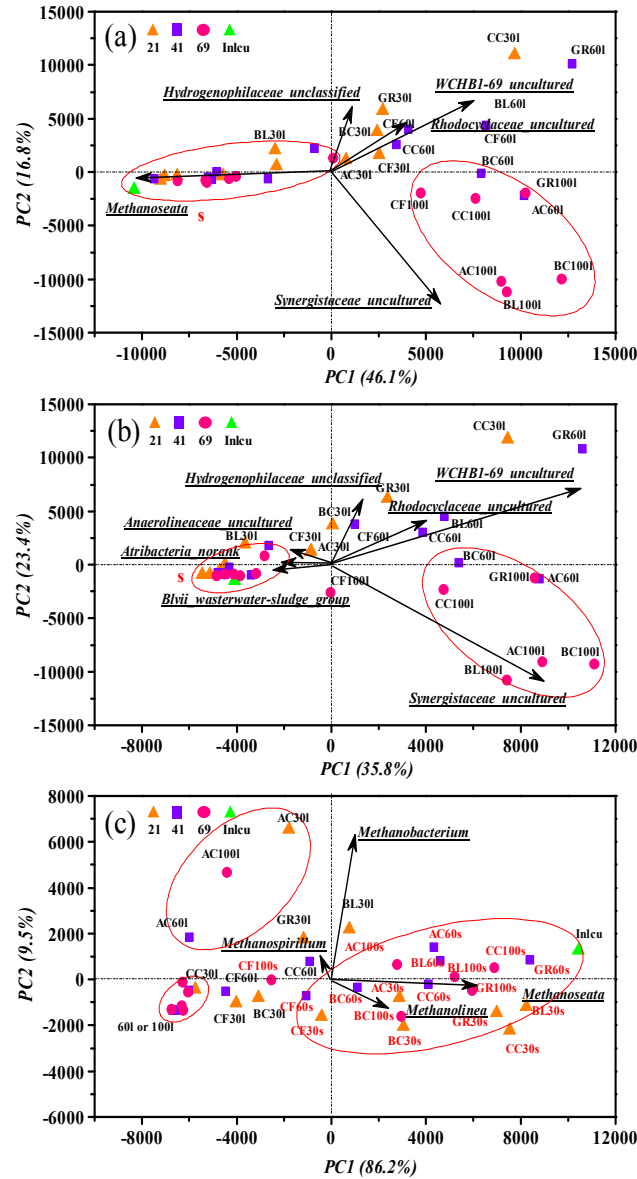

**Figure S4 Principal component analysis.** (a) total microbiomes, (b) bacteria, (c) archaea. “s” and “l”: the fractions of sediment and liquid; “21” (0.21 atm  $p_{CO}$ ), “41” (0.41 atm  $p_{CO}$ ) and “69” (0.69 atm  $p_{CO}$ ): different stages with  $p_{CO}$ ; “BL”: blank without additives, “AC”: addition with carbon material activated carbon, “BC”: biochar, “GR”: graphene, “CC”: carbon cloth, “CF”: carbon fibre; “Inocu”: the inoculum. According to the  $p_{CO}$ , the experiment was divided into four stages: I (0–62 d), II (63–92 d), III (93–120 d), and IV (121–156 d), corresponding to an initial  $p_{CO}$  of 0.07 atm, 0.21 atm, 0.41 atm and 0.69 atm, respectively.



**Table S1** Parameters related to microbial community diversity.

| Sample ID | Reads | Parameters |                   |          |                      |
|-----------|-------|------------|-------------------|----------|----------------------|
|           |       | OTU        | Chao <sup>*</sup> | Coverage | Simpson <sup>†</sup> |
| Inocu     | 35816 | 280        | 332               | 0.9982   | 0.2253               |
| AC30s     | 31503 | 297        | 394               | 0.9970   | 0.1410               |
| BC30s     | 29522 | 292        | 434               | 0.9965   | 0.1562               |
| BL30s     | 32806 | 258        | 387               | 0.9971   | 0.2039               |
| GR30s     | 32031 | 330        | 424               | 0.9968   | 0.1859               |
| CC30s     | 35351 | 293        | 439               | 0.9971   | 0.1757               |
| CF30s     | 30793 | 368        | 488               | 0.9965   | 0.0675               |
| AC60s     | 33229 | 359        | 462               | 0.9969   | 0.1202               |
| BC60s     | 32420 | 433        | 548               | 0.9966   | 0.0843               |
| BL60s     | 31902 | 340        | 474               | 0.9964   | 0.1377               |
| GR60s     | 42347 | 391        | 486               | 0.9975   | 0.1399               |
| CC60s     | 37560 | 394        | 494               | 0.9970   | 0.1049               |
| CF60s     | 38720 | 376        | 489               | 0.9972   | 0.0562               |
| AC100s    | 34714 | 427        | 521               | 0.9971   | 0.0935               |
| BC100s    | 29595 | 383        | 487               | 0.9962   | 0.1271               |
| BL100s    | 29243 | 352        | 481               | 0.9961   | 0.156                |
| GR100s    | 34256 | 407        | 582               | 0.9961   | 0.1421               |
| CC100s    | 41028 | 376        | 552               | 0.9970   | 0.1195               |
| CF100s    | 40365 | 391        | 492               | 0.9974   | 0.0557               |
| AC30l     | 43074 | 385        | 474               | 0.9978   | 0.0630               |
| BC30l     | 38427 | 252        | 343               | 0.9980   | 0.1002               |
| BL30l     | 43869 | 294        | 419               | 0.9979   | 0.1321               |
| GR30l     | 40633 | 302        | 379               | 0.9980   | 0.1128               |
| CC30l     | 42724 | 236        | 298               | 0.9983   | 0.2447               |
| CF30l     | 36592 | 243        | 355               | 0.9978   | 0.1015               |
| AC60l     | 35186 | 248        | 338               | 0.9977   | 0.1542               |
| BC60l     | 29907 | 215        | 313               | 0.9976   | 0.1134               |
| BL60l     | 33640 | 175        | 235               | 0.9985   | 0.1353               |
| GR60l     | 43355 | 184        | 290               | 0.9987   | 0.2642               |
| CC60l     | 41843 | 253        | 375               | 0.9981   | 0.0762               |
| CF60l     | 29933 | 200        | 303               | 0.9975   | 0.0922               |
| AC100l    | 43830 | 215        | 278               | 0.9985   | 0.1476               |
| BC100l    | 39727 | 228        | 415               | 0.9978   | 0.1963               |
| BL100l    | 41748 | 213        | 279               | 0.9986   | 0.1322               |
| GR100l    | 42970 | 243        | 307               | 0.9983   | 0.0950               |
| CC100l    | 31482 | 224        | 313               | 0.9977   | 0.0900               |
| CF100l    | 33999 | 203        | 243               | 0.9984   | 0.1460               |

\* Chao: Chao1 algorithm is used to estimate the number of OTU samples contained in the index. Chao1 is commonly used in ecology to estimate the total number of species, first proposed by Chao (1984) (<http://www.mothur.org/wiki/Chao>).

† Simpson: Simpson is used to estimate one of the microbial diversity indices in the sample, proposed by Edward Hugh Simpson (1949), is commonly used in ecology to quantitatively describe a region's biodiversity. The larger the Simpson index, the lower the diversity of the community (<http://www.mothur.org/wiki/Simpson>).
